# Supplementary material for: La profesionalización del servicio militar en España: una aproximación económica
Source: Royal Society of Chemistry journal article supplement (doi:10.1039/d2bm01126c), 2000-01-01
Supplement: d2bm01126c1.pdf [file d2bm01126c1.pdf]

## Supporting information

### **Boosting Cancer Immunotherapy by an Biomineralized Nanovaccine with Ferroptosis-Inducing and Photothermal Properties**

*Siyu Ma, Xiao Liang, Ning Yang, Jie Yang, Jun Zhang, Xiuhua Pan, Yawen Wei,  
Zengyi Liu, Qi Shen \**

**Affiliations:**

School of Pharmacy, Shanghai Jiao Tong University, 800 Dongchuan  
Road, Shanghai 200240, China

**Corresponding author details:**

Qi Shen

School of Pharmacy, Shanghai Jiao Tong University, 800 Dongchuan Road, Shanghai  
200240, China

Tel: +86-21-34204049

Fax: +86-21-34204049

E-mail: [qshen@sjtu.edu.cn](mailto:qshen@sjtu.edu.cn)

## Supplementary Data and Figures

|              | Encapsulation Efficiency for Fe(OH) <sub>3</sub> | Drug-Loading Rate for Fe(OH) <sub>3</sub> | Encapsulation Efficiency for IR820 | Drug-Loading Rate for IR820 |
|--------------|--------------------------------------------------|-------------------------------------------|------------------------------------|-----------------------------|
| Fe@OVA-IR820 | 41.99±2.37%                                      | 11.97±0.67%                               | 50.04±3.48%                        | 1.87±0.13%                  |

**Figure S1.** Encapsulation rate and drug loading rate of Fe@OVA-IR820 nanovaccine to Fe(OH)<sub>3</sub> and IR820.

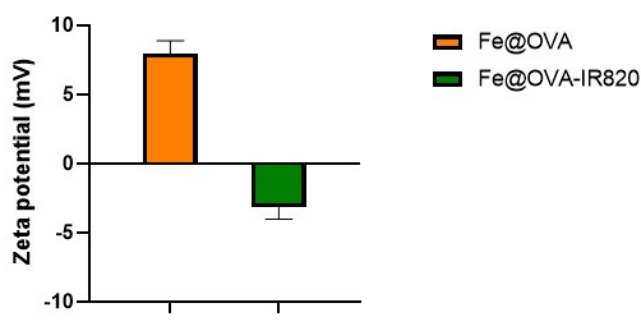

**Figure S2.** Zeta potential of Fe@OVA and Fe@OVA-IR820.

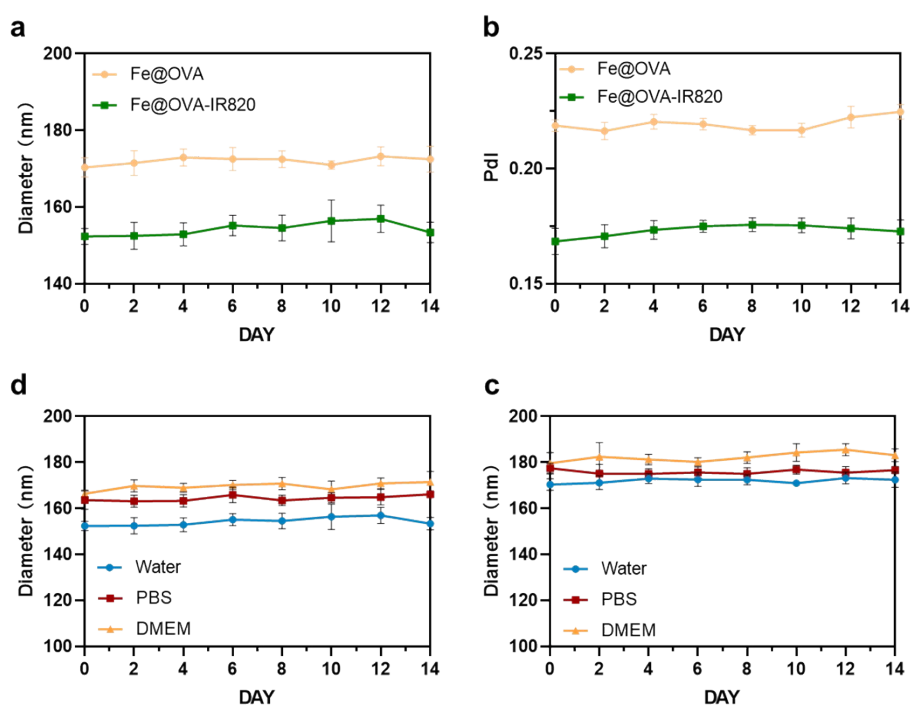

**Figure S3.** The stability of prepared nanoparticles at 4 °C for 14 days. The particle size (a) and PDI (b) were determined. The stability of the stability of Fe@OVA - IR820 (c) and Fe@OVA (d) in various physiological solutions was recorded.

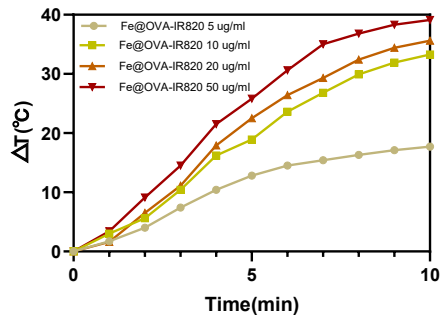

**Figure S4.** The rising temperature with different concentrations of Fe@OVA-IR820 under laser irradiation.

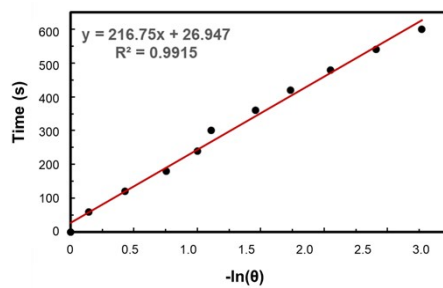

**Figure S5.** Plot and linear fit of time versus negative natural logarithm of the temperature increment for the cooling rate of Fe@OVA-IR820 solution.

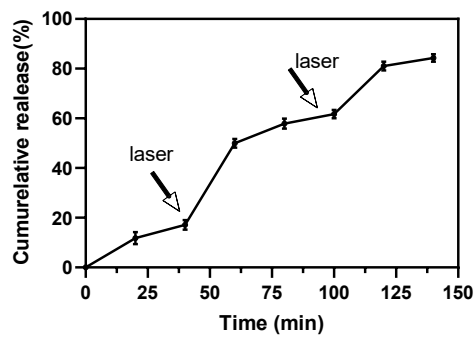

**Figure S6.** In vitro cumulative iron ions from nanovaccines incubated with PBS (pH 5.0) at 37°C upon 5 min 808 nm laser irradiation (n = 3).

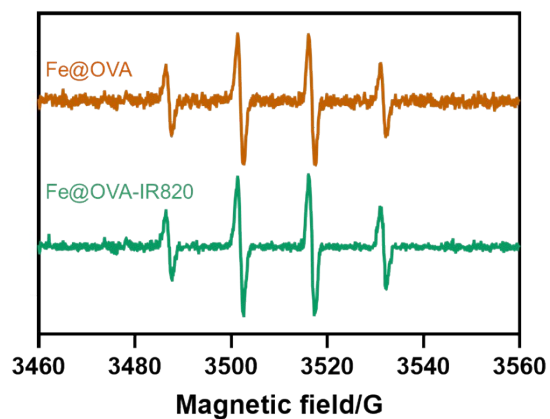

**Figure S7.** ESR spectra of nanoparticle-generated  $\bullet\text{OH}$  (experimental conditions: DMPO concentration of 100 mM, and trapping time of 10 min).

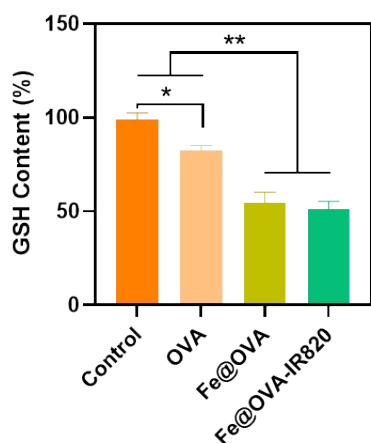

**Figure S8.** Content of GSH after treatment with different preparations.

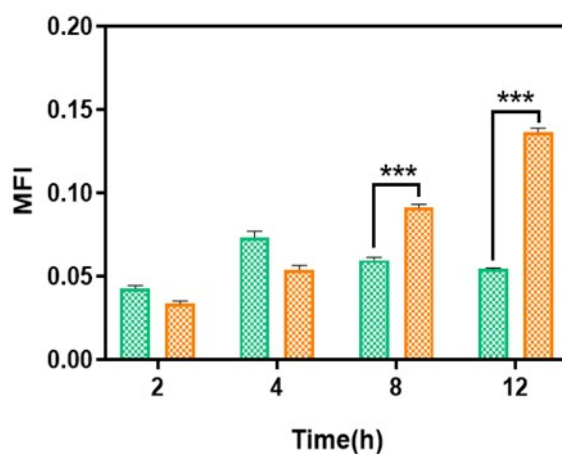

**Figure S9.** Fluorescence semi-quantitative analysis of IR820 signal in Fig.2A (n = 3).

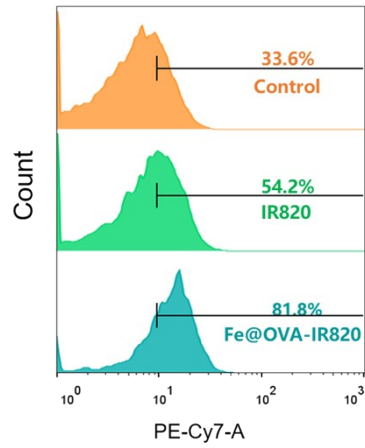

**Figure S10.** Cellular uptake of free IR820 and Fe@OVA-IR820 in NIH-3T3 cells detected by flow cytometry after 12 hours of incubation.

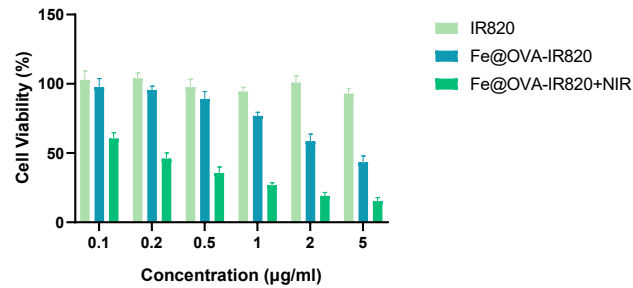

**Figure S11.** Relative viabilities of NIH-3T3 cells after incubated 12h and irradiated for 5 minutes.

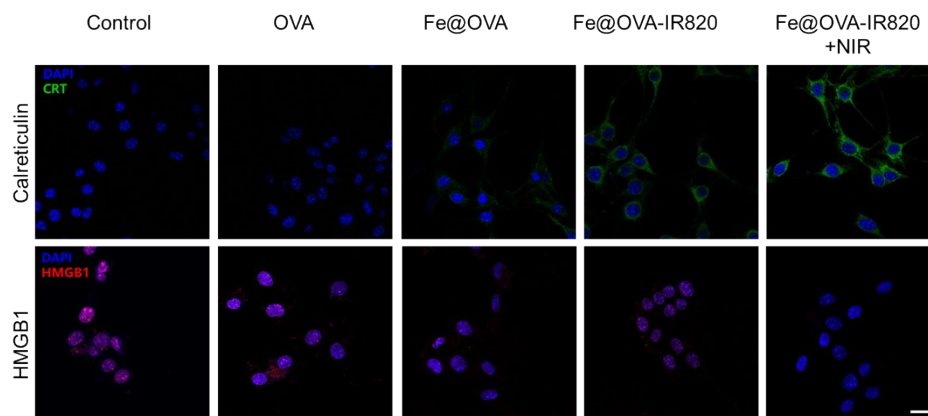

**Figure S12.** Immunofluorescence signal acquisition of calreticulin (above) and HMGB1 (below). Scale, 50 µm.

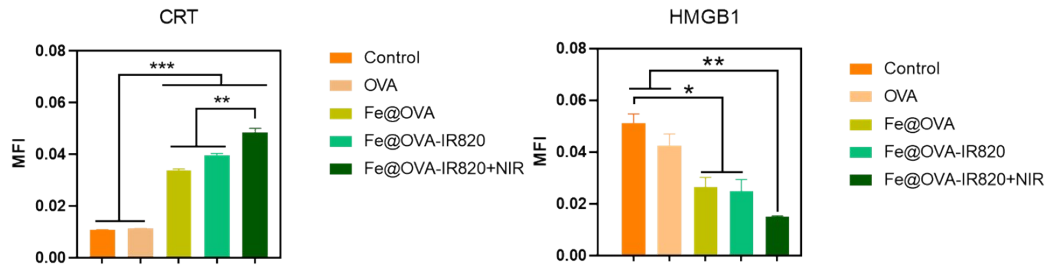

**Figure S13.** The fluorescence semi-quantification of CRT (upside) and HMGB1 (below) signal in respectively.

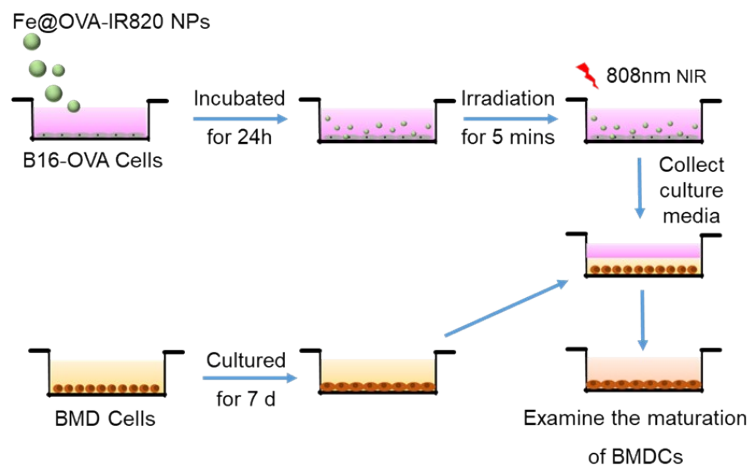

**Figure S14.** Schematic illustration of stimulating the maturation of bone marrow-derived cells (BMDCs). CD11c-positive dendritic cells were gated by flow cytometry.

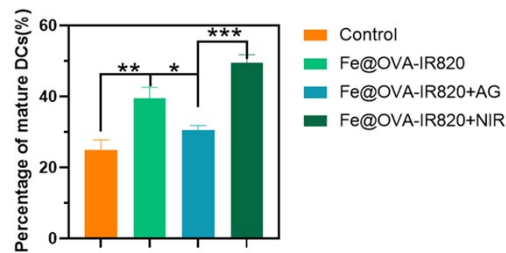

**Figure S15.** Percentage of mature DC cells of Figure 3G.

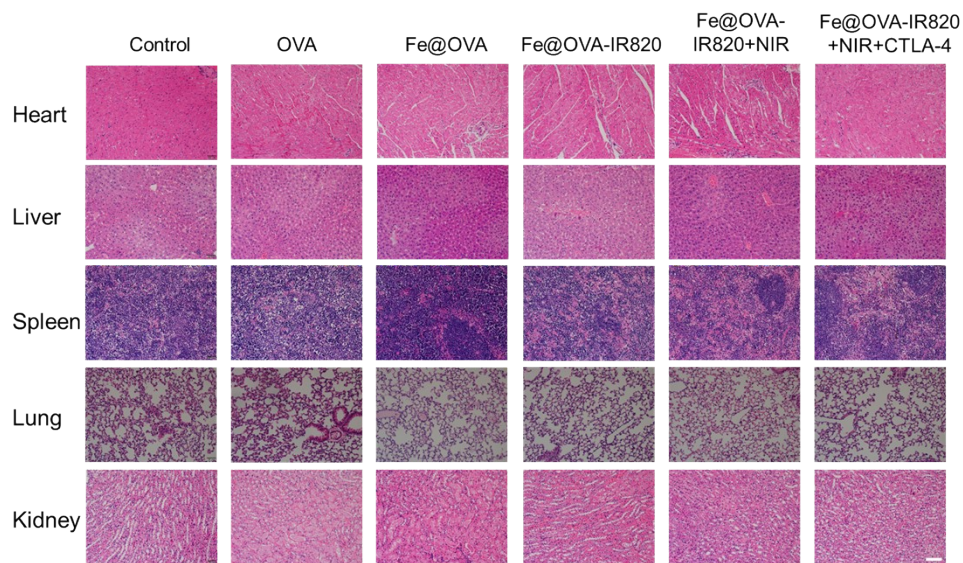

**Figure S16.** H&E staining of major organs at the end of anti-tumor efficacy experiment, scale bars are 100  $\mu\text{m}$ .

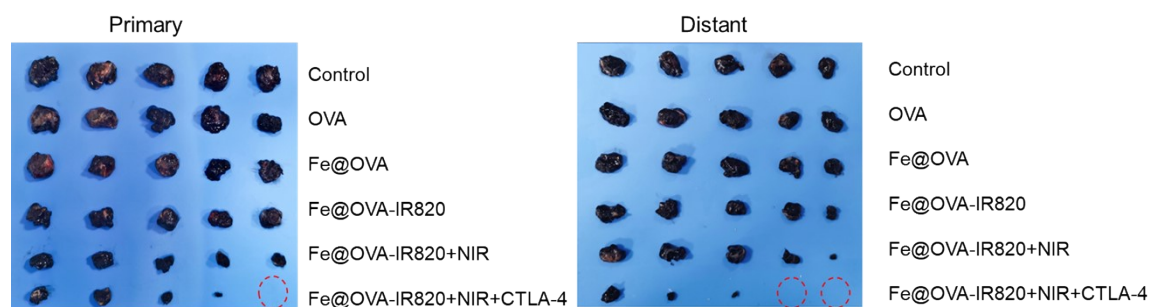

**Figure S17.** Images of the primary tumor(left) and the distant(right) tumor taken after extraction.

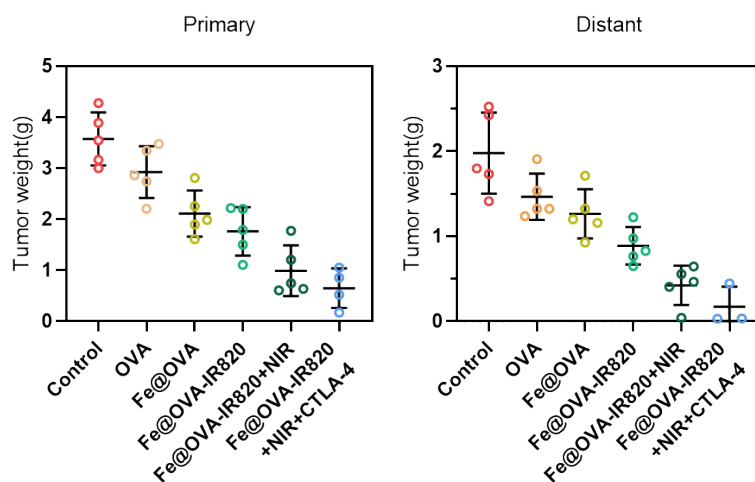

**Figure S18.** The weight of primary and distant tumors in each group was recorded



after extraction.

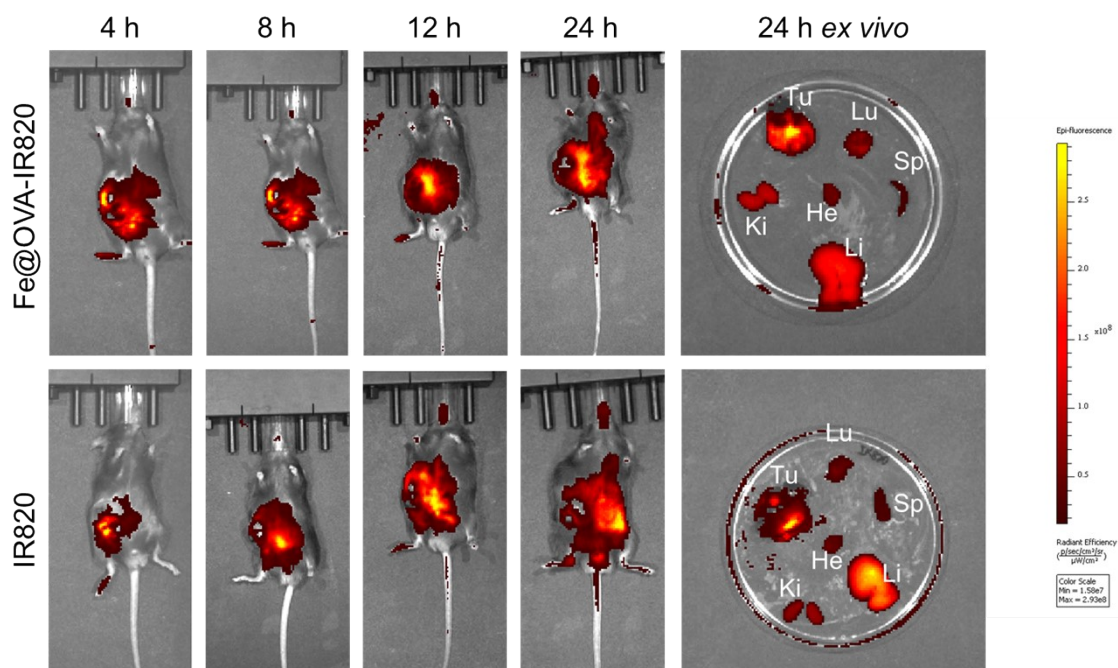

**Figure S19.** In vivo fluorescence images of mice after Intratumoral injection IR820 and Fe@OVA-IR820 at different time points.

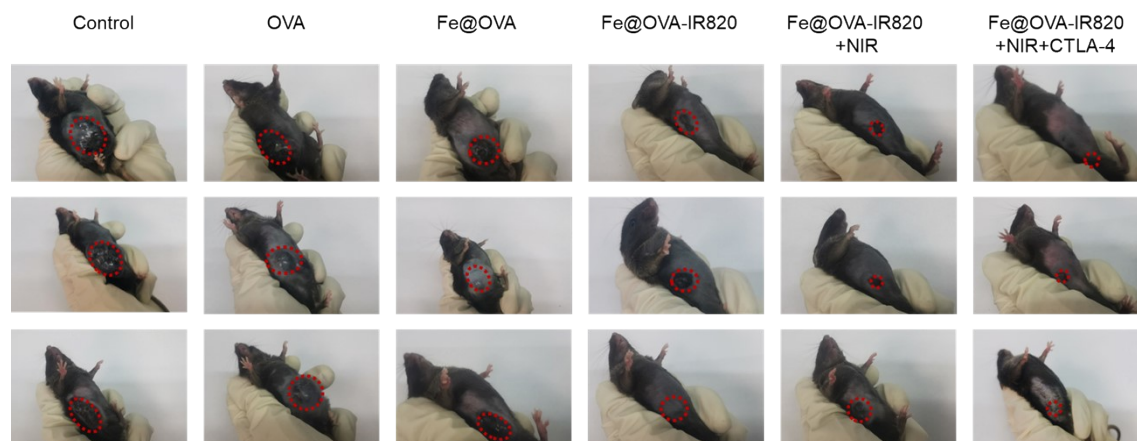

**Figure S20.** Images of tumor-bearing mice during the treatment process.



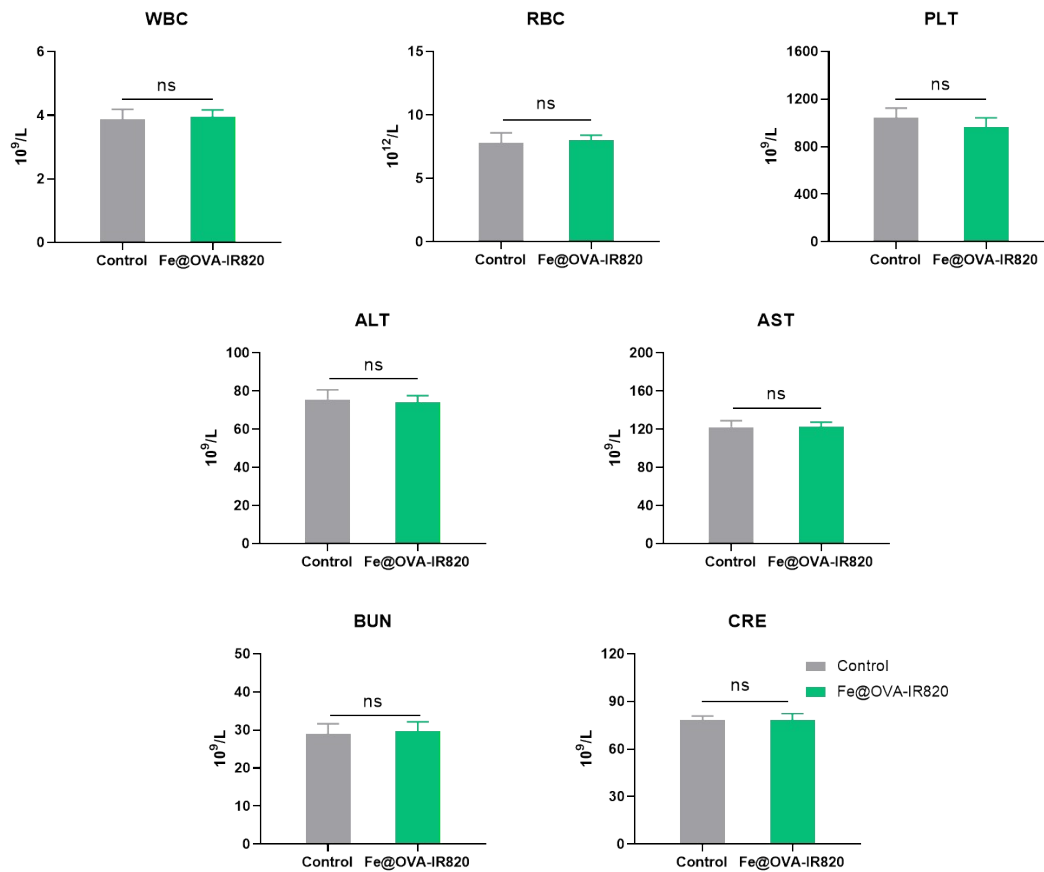

**Figure S21.** Blood routine examination and serum biochemistry data of mice intravenously administrated with saline, Fe@OVA-IR820.  $n = 3$ , Means  $\pm$  SD. Significance is defined as ns, no significance, \* $P < 0.05$ , \*\* $P < 0.01$ , \*\*\* $P < 0.001$ .

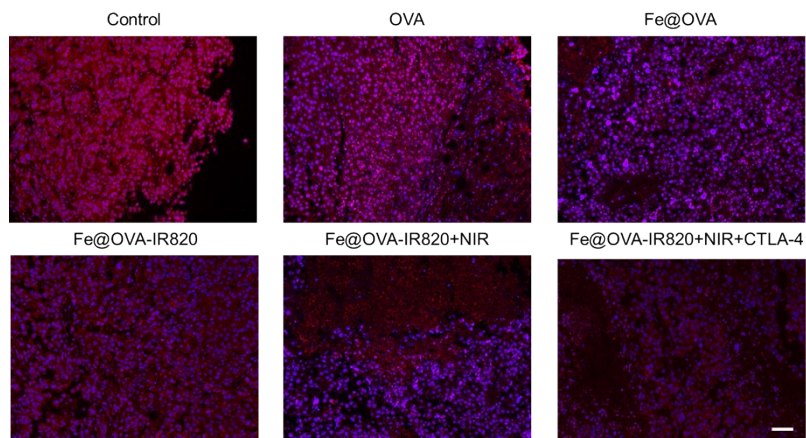

**Figure S22.** Immunofluorescence staining of GPX4 in tumor sites after various treatments. Scale bar: 100  $\mu m$ .

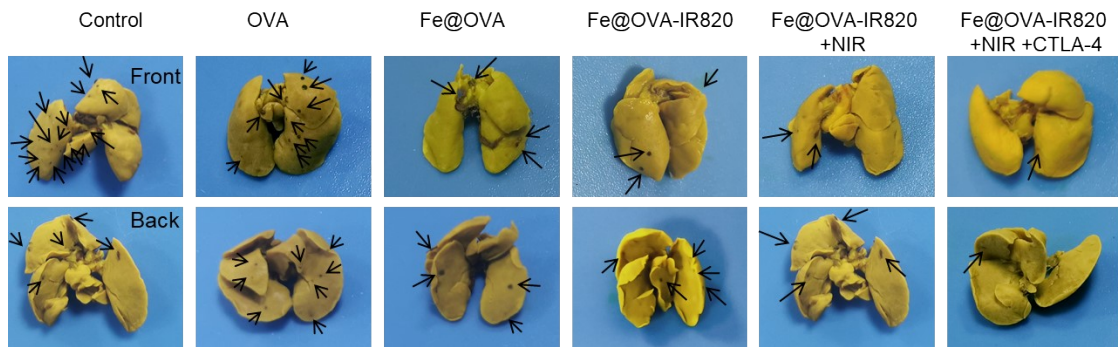

**Figure S23.** Representative photographs of lung metastasis in B16-OVA tumor model.

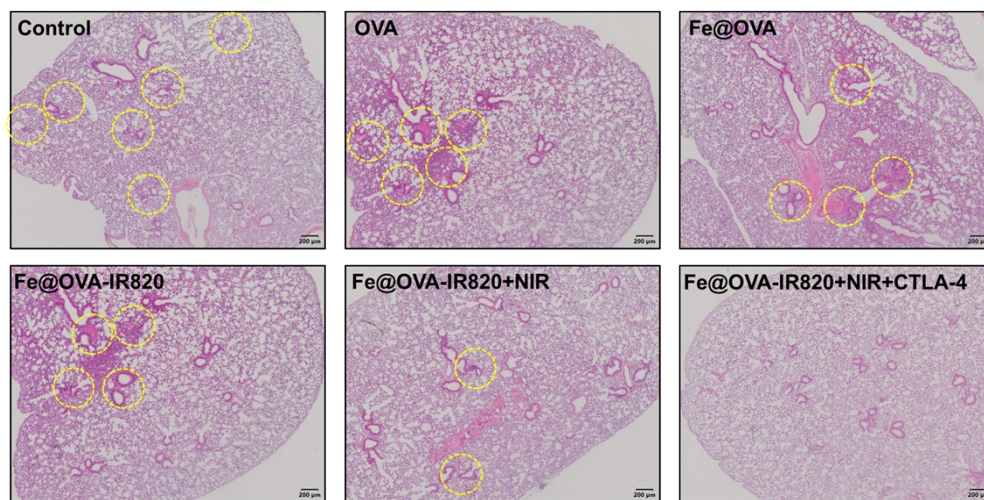

**Figure S24.** Images of lung tissue collected after light ablation, sections, and hematoxylin-eosin staining. Sites of tumor metastasis are indicated by yellow circles. Scale bar, 200  $\mu\text{m}$ .

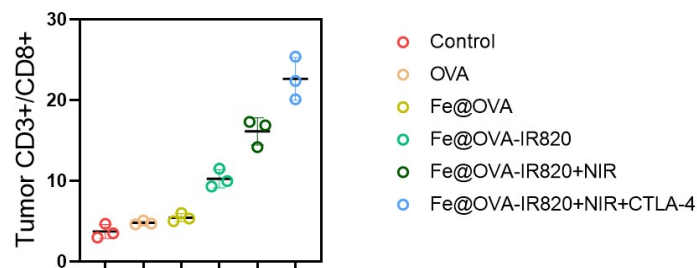

**Figure S25.** The relative quantification results of T cells (CD3+/CD8+) in Fig. 5C.

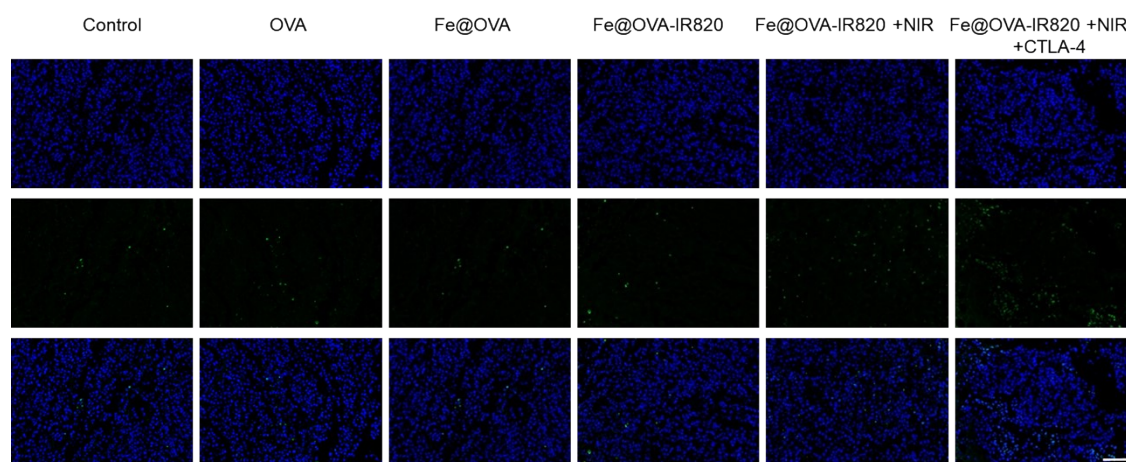

**Figure S26.** TUNEL staining of tumor tissue images of different groups of tumor sections. Scale: 100  $\mu$ m.

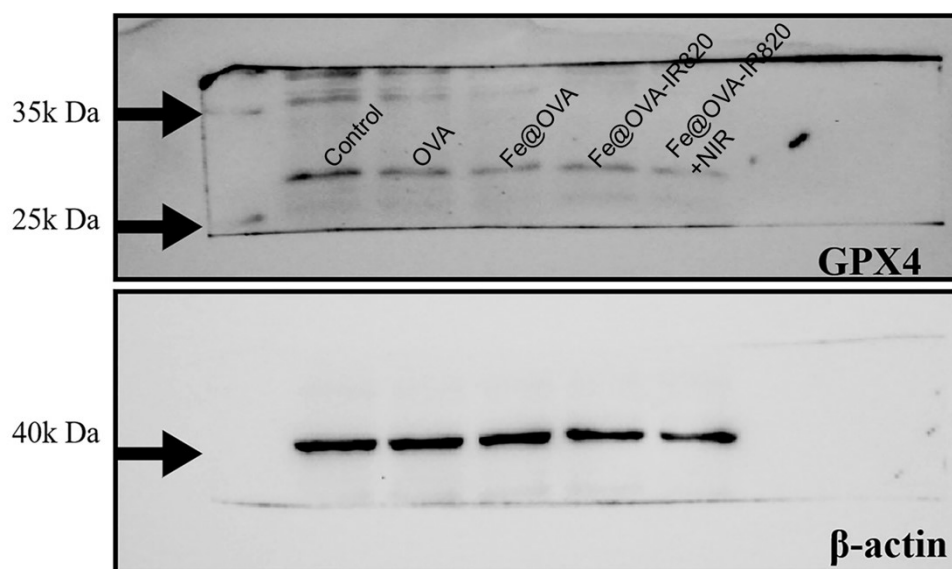

**Figure S27.** Uncropped images for Figure 2D.
